# Supplementary material for: Effect of New-Onset Diabetes Mellitus on Renal Outcomes and Mortality in Patients with Chronic Kidney Disease
Source: PubMed Central journal article supplement (PMC6306867; doi:10.3390/jcm7120550), 2018-12-14
Supplement: jcm-07-00550-s001.pdf [file jcm-07-00550-s001.pdf]

**Supplementary Table 1.** ICD-9-CM codes used to identify chronic kidney disease, comorbidities and the cause of death.

| Diseases                  | Corresponding ICD-9-CM codes                                                                                                                   |
|---------------------------|------------------------------------------------------------------------------------------------------------------------------------------------|
| Chronic kidney disease    | 585                                                                                                                                            |
| Diabetes mellitus         | 250.x                                                                                                                                          |
| <b>Co-morbid diseases</b> |                                                                                                                                                |
| Hypertension              | 401.x–405.x                                                                                                                                    |
| Hyperlipidemia            | 272.x                                                                                                                                          |
| Ischemic heart disease    | 410.x–414.x                                                                                                                                    |
| Congestive heart failure  | 428.x                                                                                                                                          |
| COPD                      | 491.x, 492.x, 496.x                                                                                                                            |
| Rheumatoid disease        | 446.5, 710.0-710.4, 714.0-714.2, 714.8, 725.x                                                                                                  |
| Cancer                    | 140-165, 170-172, 174-195, 200-208                                                                                                             |
| Stroke                    | 430.x–438.x                                                                                                                                    |
| <b>Causes of Death</b>    |                                                                                                                                                |
| Cardiovascular death      | 390.x – 398.x, 410.x – 414.x, 4151, 41511, 41519, 420.x, 422.x – 429.x, 431.x, 433.x – 436.x, 518.4, 785.51                                    |
| Infection-related death   | 001.x – 139.x, 320.x, 321.x, 326.x, 421.x, 460.x – 466.x, 480.x – 487.x, 510.x, 513.x, 551.x, 567.x, 590.x, 599.x, 680.x – 686.x, 711.x, 730.x |
| Other causes              | Diagnostic codes other than cardiovascular and infection-related death                                                                         |

Abbreviation: COPD, chronic obstructive pulmonary disease; ICD-9-CM, International Classification of Disease, 9<sup>th</sup> Revision, Clinical Modification.

**Supplementary Table 2: Risks for Composite endpoint (ESRD or mortality), ESRD and mortality among patients with CKD by DM status**

| Outcome                 | Time-dependent Cox's Model <sup>†</sup> |         |                        |         |
|-------------------------|-----------------------------------------|---------|------------------------|---------|
|                         | Pre-existing DM vs. Incident DM         |         | Non-DM vs. Incident DM |         |
|                         | aHR (95% CI)                            | P-value | aHR (95% CI)           | P-value |
| Composite Endpoint      | 1.35(1.3-1.41)                          | <.0001  | 0.60(0.57-0.62)        | <.0001  |
| ESRD                    | 2.30(2.17-2.44)                         | <.0001  | 0.89(0.84-0.95)        | 0.0003  |
| All-cause mortality     | 0.99(0.95-1.04)                         | 0.7802  | 0.44(0.42-0.46)        | <.0001  |
| Cardiovascular death    | 1.21(1.09-1.36)                         | 0.0006  | 0.40(0.35-0.45)        | <.0001  |
| Infection-related death | 0.88(0.82-0.95)                         | 0.001   | 0.37(0.34-0.40)        | <.0001  |

Abbreviation: CI = confidence interval; aHR = adjusted hazard ratio; IR =incidence rate (per 1000 person-years);

<sup>†</sup>aHR was calculated from IPW-standardized time-dependent cause-specific Cox model, where the inverse probability of group-weighted (IPW) was estimated by the propensity of group from generalized boosted regression.

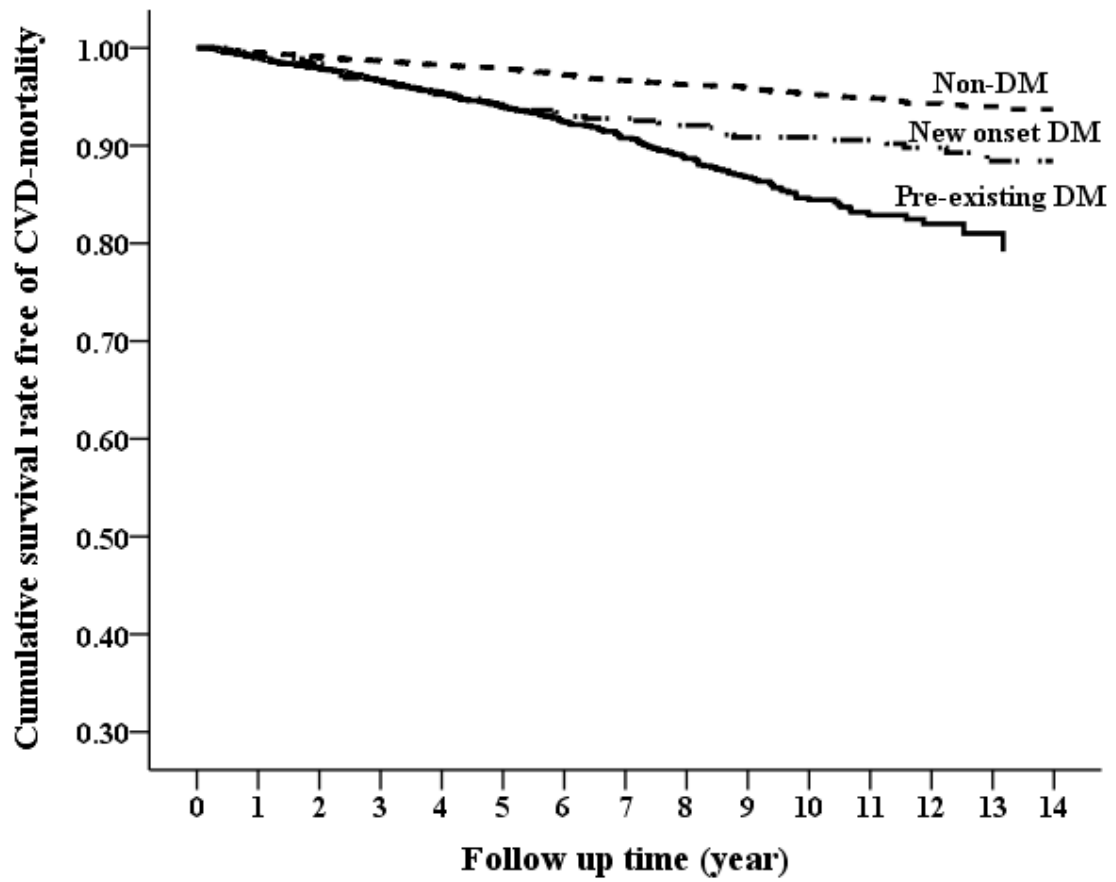

Supplementary Figure 1. Cumulative survival curves free of cardiovascular death between pre-existing DM, non-DM and incident DM groups.

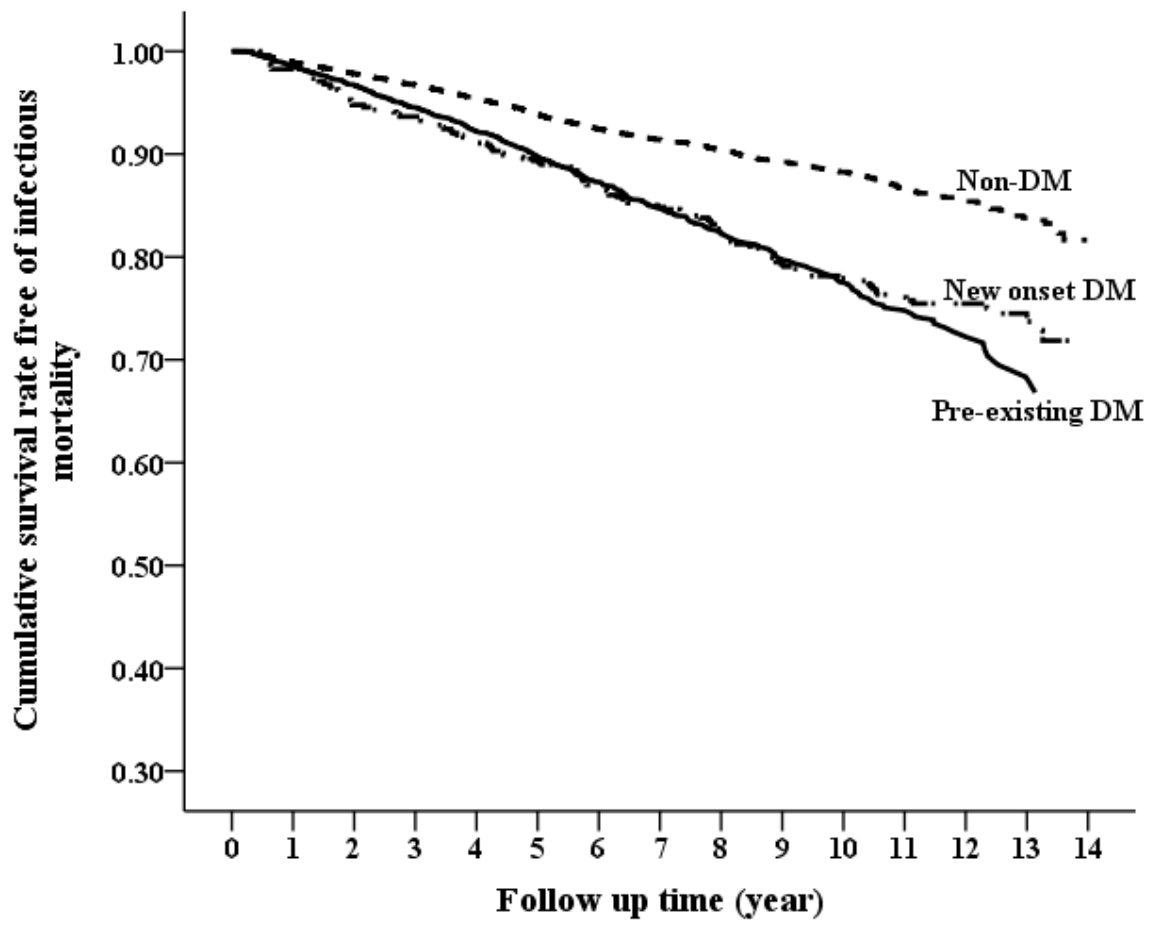

Supplementary Figure 2. Cumulative survival curves free of infectious death between pre-existing DM, non-DM and incident DM groups.
